# Supplementary material for: Designing a bioactive scaffold from coassembled collagen–laminin short peptide hydrogels for controlling cell behaviour
Source: Royal Society of Chemistry journal article supplement (doi:10.1039/c9ra07454f), 2019-01-01
Supplement: c9ra07454f1.pdf [file c9ra07454f1.pdf]

## Supporting Information

### Designing bioactive scaffold from co-assembled collagen-laminin short peptide hydrogels for controlling cell behaviour

Rashmi Jain,<sup>a</sup> Sangita Roy<sup>a\*</sup>

<sup>a</sup>*Institute of Nano Science and Technology, Mohali, India*

**Table S1:** Mass analysis of synthesized peptides using LC-MS.

| <b>Peptides</b>  | <b>Calculated Mass (m/z)<br/>(Chem Draw)</b> | <b>Observed Mass (m/z)<br/>(LC-MS)</b> |
|------------------|----------------------------------------------|----------------------------------------|
| <b>Nap-FFGSO</b> | 753.32                                       | 753.61                                 |
| <b>Nap-IKVAV</b> | 712.43                                       | 712.66                                 |
| <b>Nap-YIGSR</b> | 778.38                                       | 778.65                                 |

**Table S2:** Comparison of morphologies of different nanostructures and the diameter of nano fibrous network of collagen-laminin co-assembled hydrogels.

| Peptide composition | Morphology                    | Diameter (nm) |            |
|---------------------|-------------------------------|---------------|------------|
|                     |                               | AFM           | TEM        |
| Na-FFGSO            | Aggregates                    | --            |            |
| Nap-IKVAV           | Fibers                        | 40 ± 4.5      | 35± 3.1    |
| Nap-YIGSR           | Fibers                        | 28.7 ± 4.4    | 20 ± 2.3   |
| Na-FFGSO+ A         | Short fibers                  | 62 ± 4.8      | 38 ± 5.6   |
| Nap-FFGSO+ B        | Long entangled fibers         | 17 ± 2.3      | 8 ± 2.7    |
| Nap-FFGSO+ A+ B     | Mixed fibers (long and short) | 26 ±3.1       | 10.5 ± 2.3 |

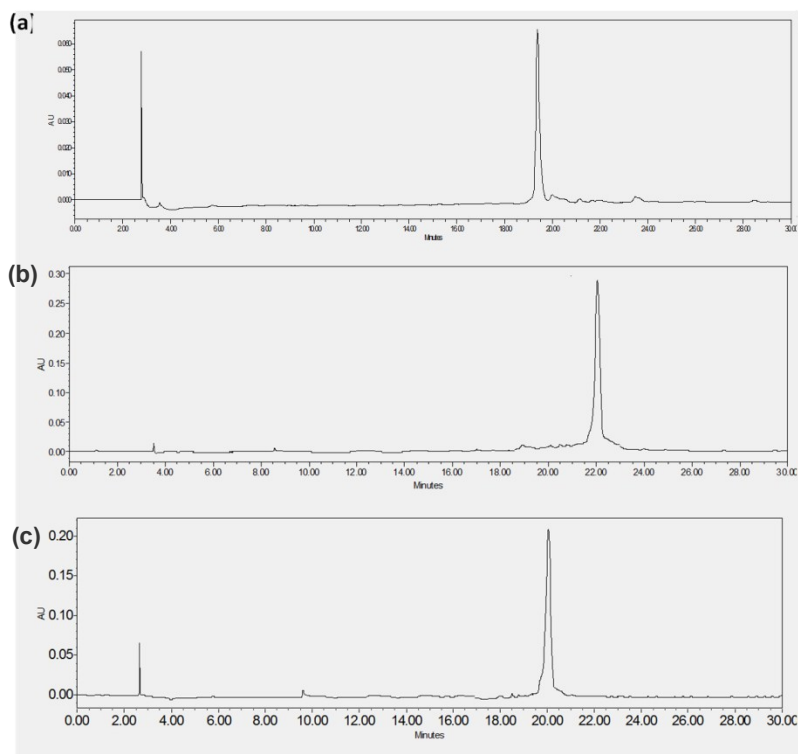

**Figure S1:** HPLC chromatograms of synthesized peptides (a) Nap-FFGSO, (b) Nap-IKVAV and (c) Nap-YIGSR.

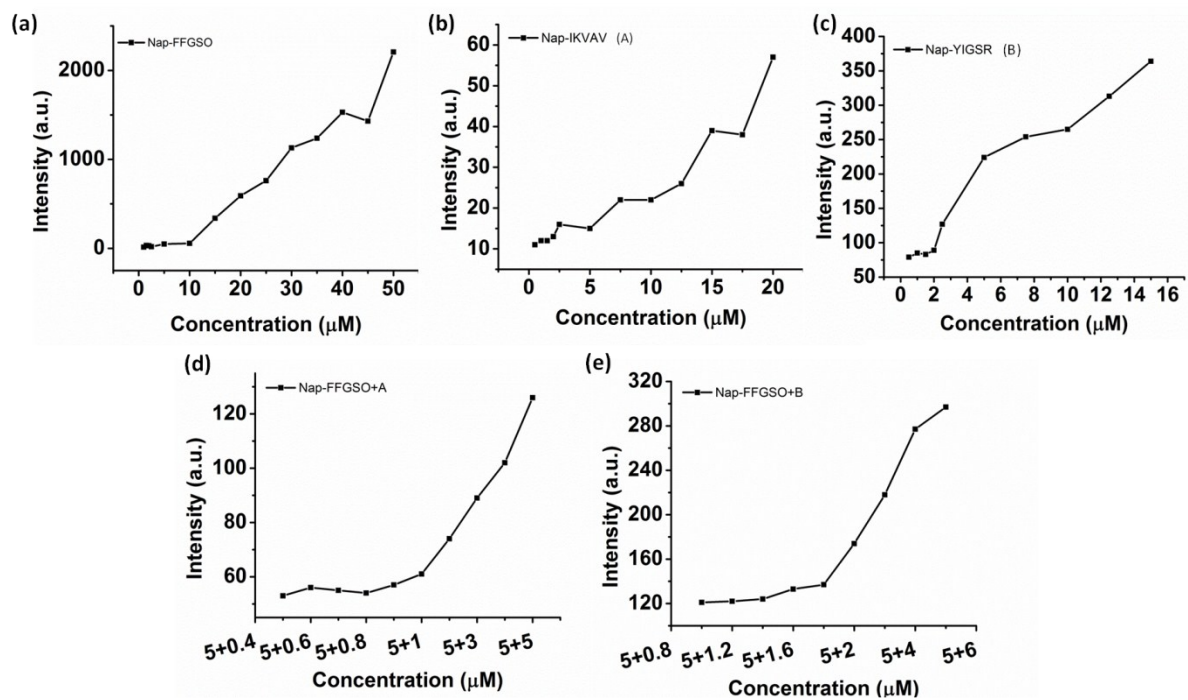

**Figure S2:** Critical aggregation concentration determination of individual peptides(a) Nap-FFGSO, (b) Nap-IKVAV, (c) Nap-YIGSR and co-assembled peptides (d) Nap-FFGSO+A and (e) Nap-FFGSO+B using Thioflavin T dye.

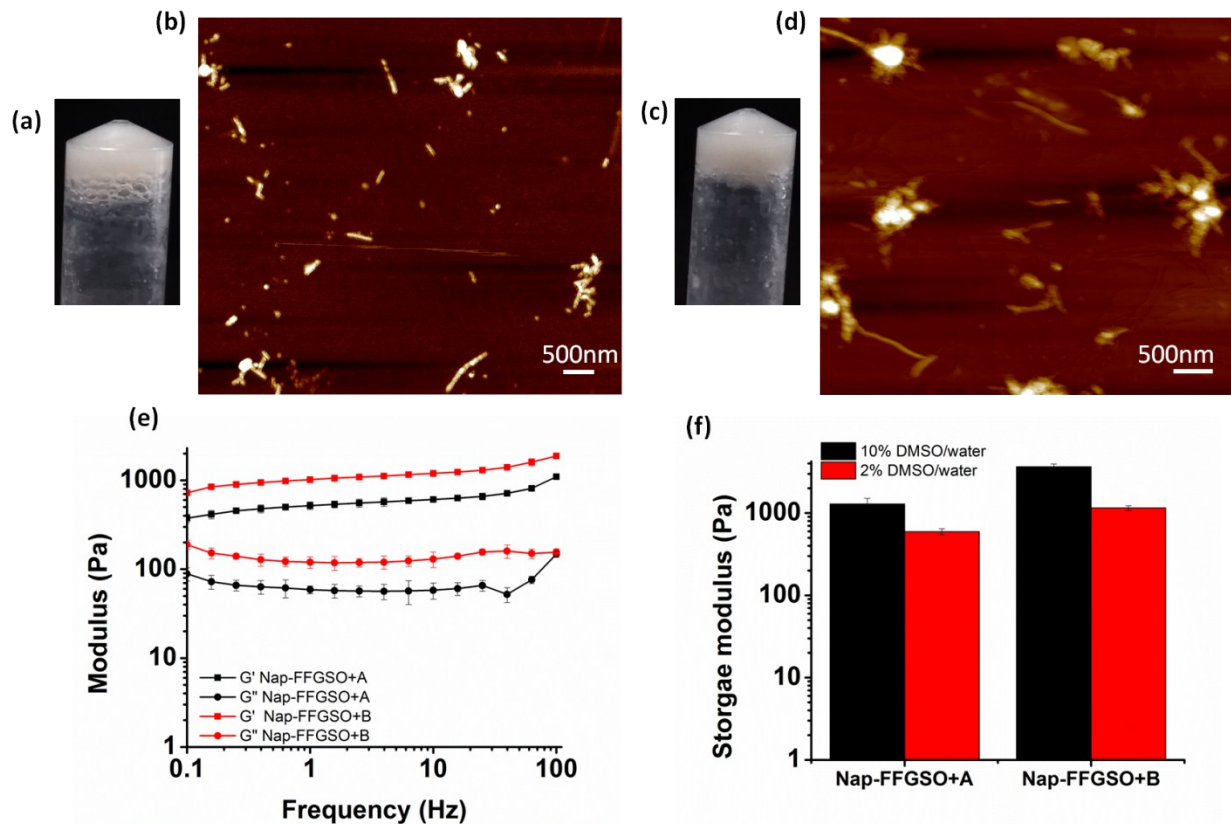

**Figure S3:** Gelation studies of collagen and laminin inspired co-assembled gels in 2% DMSO/water with optical images and respective AFM microscopic images of gels of (a & b) Nap-FFGSO+A and (c & d) Nap-FFGSO+B; (e) Rheology studies of gels prepared in 2% DMSO/water at the concentration of 30mM of Nap-FFGSO and 3mM of either Nap-IKVAV (A) or Nap-YIGSR (B) and (f) Comparison to gels prepared in 10%DMSO/water and 2% DMSO/water.

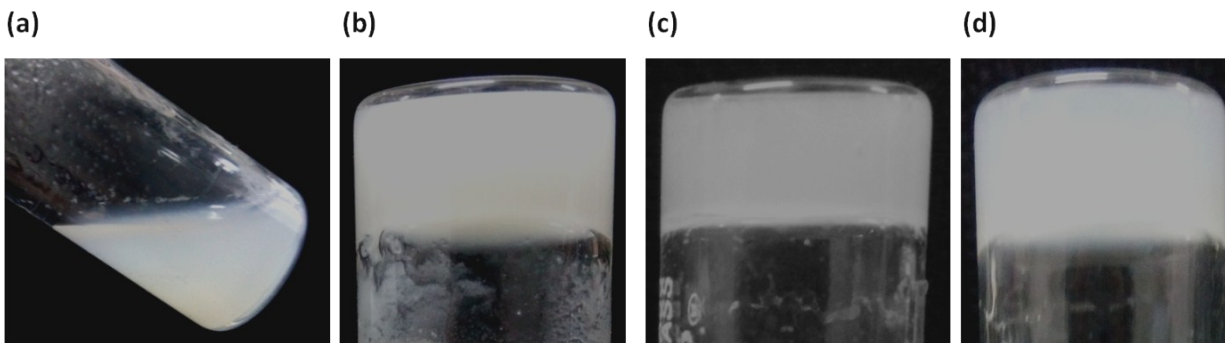

**Figure S4:** Optical images of (a) Nap-FFGSO as a solution and (b) Nap-FFGSO+A, (c) Nap-FFGSO+B, (d) Nap-FFGSO+A+B as co-assembled gels in 10% DMSO/water.

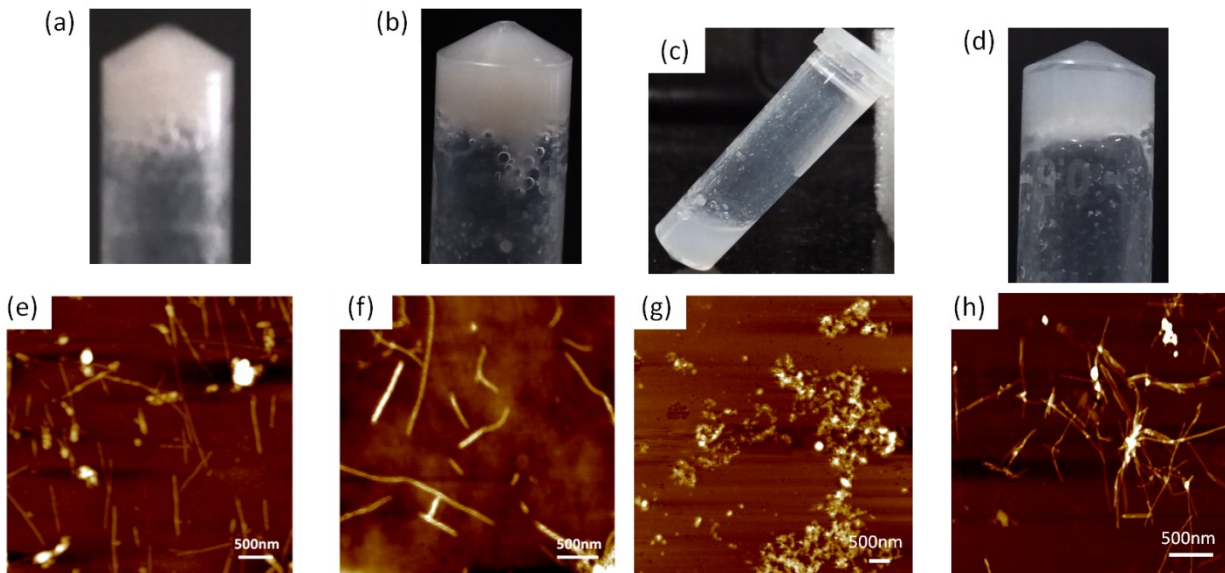

**Figure S5:** Control hydrogels with varied concentration of CIP and LMP peptide and their respective AFM images (a, e) Nap-FFGSO (20mM)+A (4.5mM), (b, f) Nap-FFGSO (20mM)+B (4.5mM), (c, g) Nap-FFGSO (20mM)+ A(1.5mM )+B (1.5mM) and (d, h) Nap-FFGSO (20mM)+ A(2.25mM )+B (2.25mM)

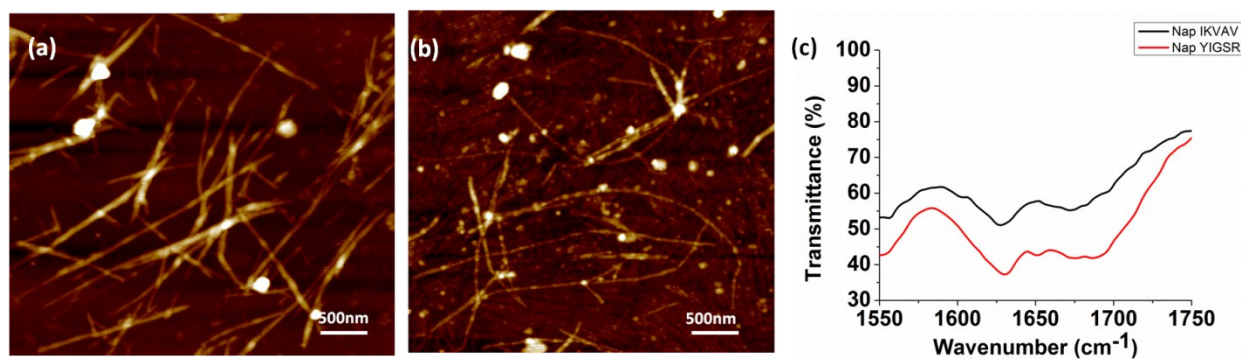

**Figure S6:** AFM images of (a) Nap-IKVAV and (b) Nap-YIGSR at 5mM concentration. (c) FTIR spectra of LMP's.



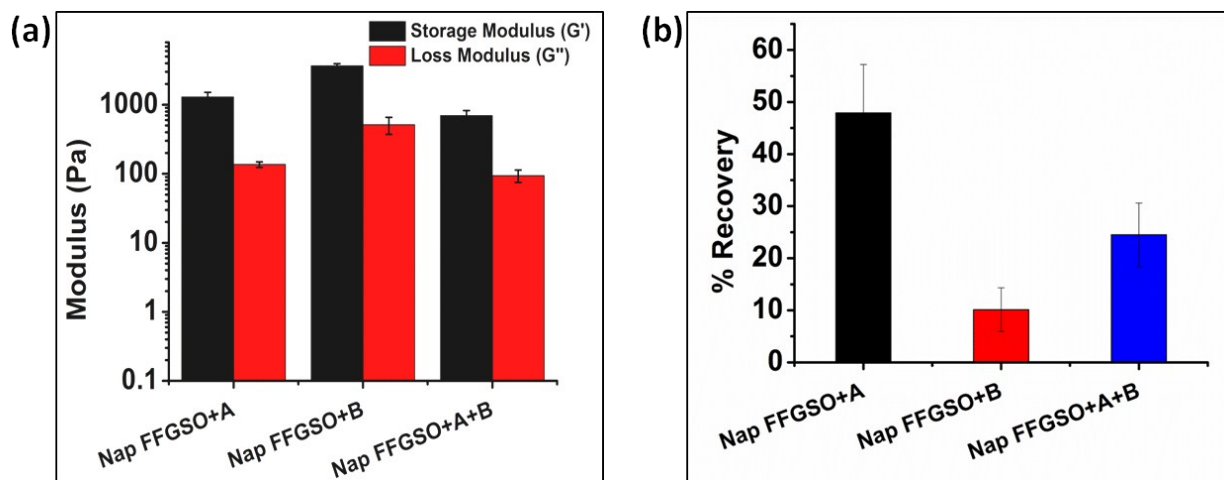

**Figure S7:** (a) Comparison of mechanical stiffness of the co-assembled peptide gels and (b) Differential percentage recovery of different collagen and laminin inspired peptide co-assembled gels after 100 sec, as evident through thixotropic studies, carried at 50% strain.

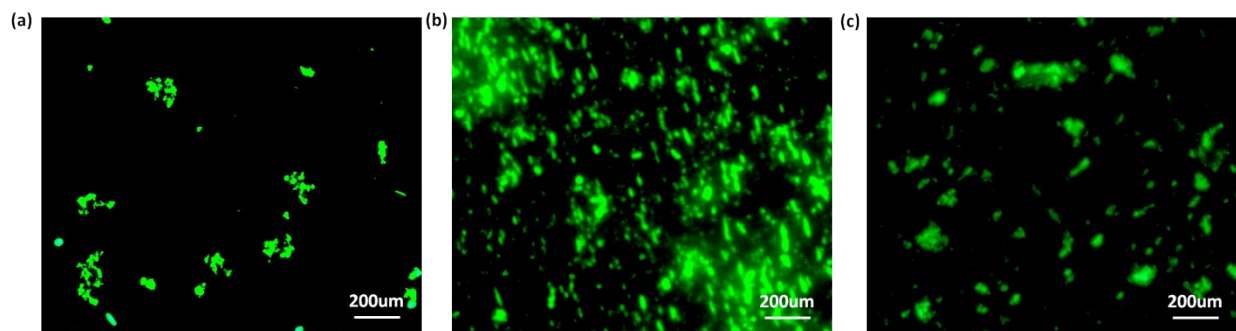

**Figure S8:** Fluorescence microscopic images of Thioflavin T bound with co-assembled peptide hydrogels (a) Nap-FFGSO + A, (b) Nap-FFGSO+B and (c) Nap-FFGSO+A+B.

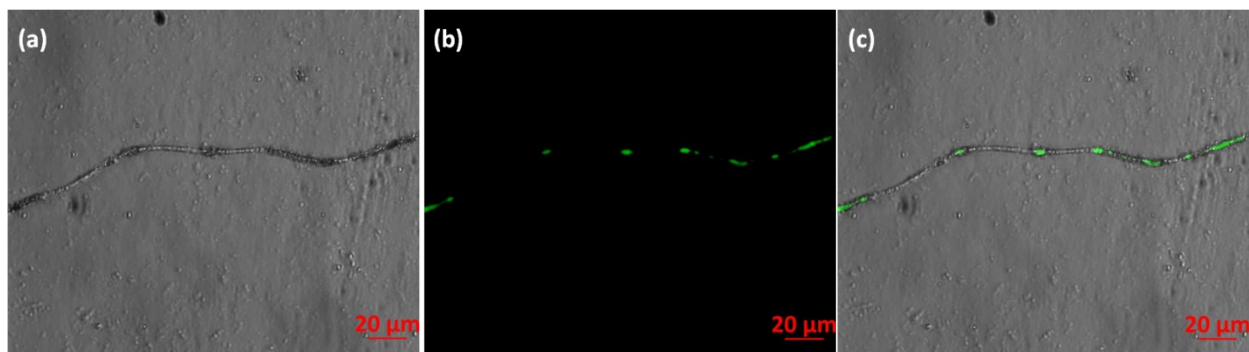

**Figure S9:** Images of co-assembled peptides with (a) bright field, (b) fluorescence and (c) merged image of bright field and fluorescence showing localization of fluorescent Nap-IKVAV along the non-fluorescent Nap-FFGSO peptide fiber.

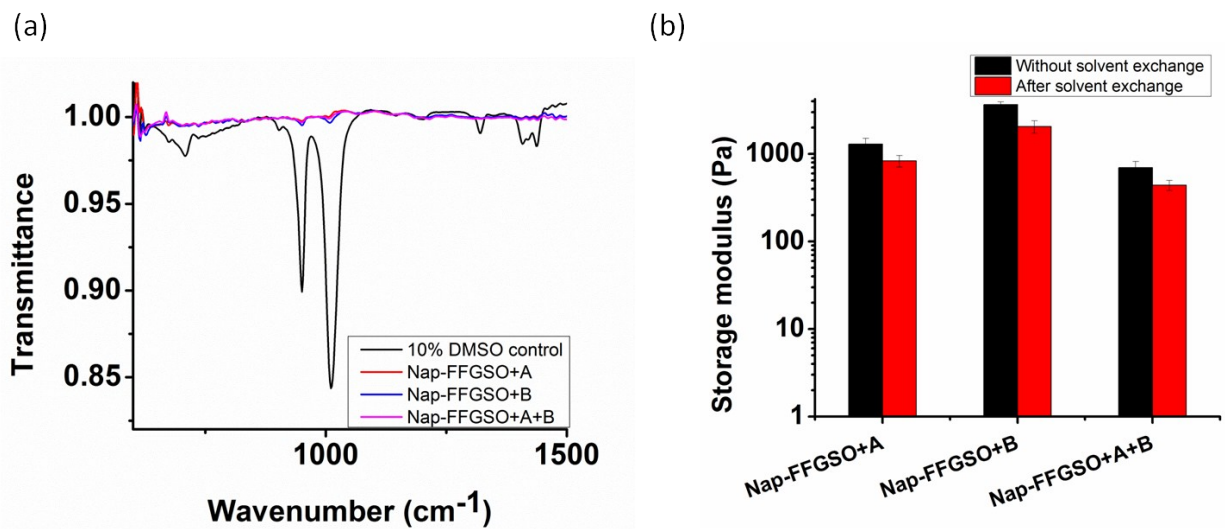

**Figure S10:** Solvent exchange of gels prepared at concentration of 30mM Nap-FFGSO and 3mM of LMP in 10% DMSO/water (a) FTIR spectra of CIP-LMP gels after solvent exchange showing diminished sulfoxide peak at 1020 cm<sup>-1</sup> and (b) Rheology measurement of gels without and after solvent exchange. The measurements were done after three consecutive cycles of solvent exchange with water.

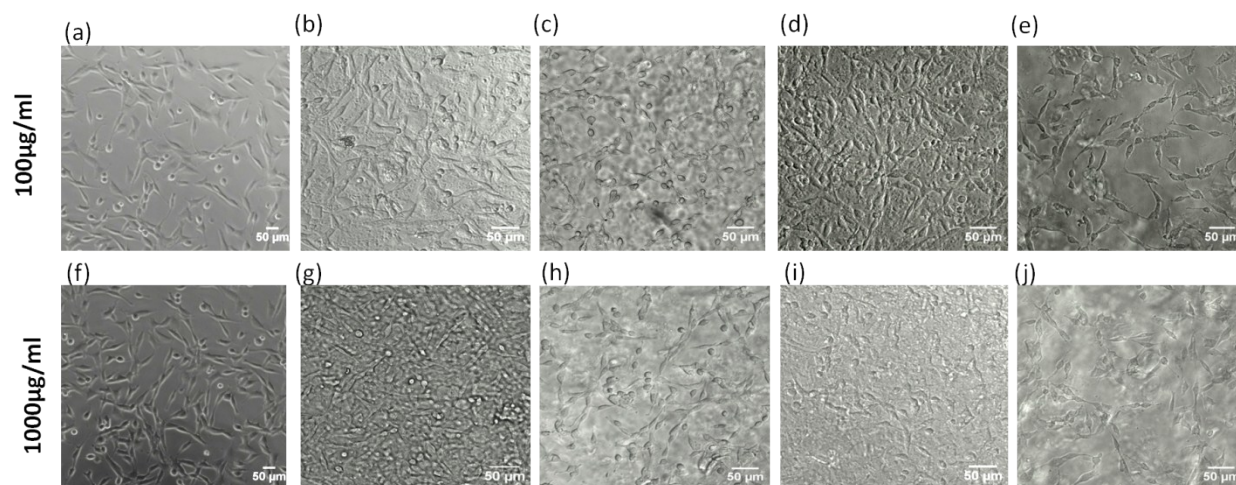

**Figure S11:** Biocompatibility studies: microscopic images of C6 cells after treatment with (a and f) control (TCP), (b and g) Nap-FFGSO, (c and h) Nap-FFGSO+A, (d and i) Nap-FFGSO+B and (e and j) Nap-FFGSO+A+B at 100µg/ml (0.13mM) and 1000µg/ml (1.3mM) concentrations, after 4 hrs of treatment.

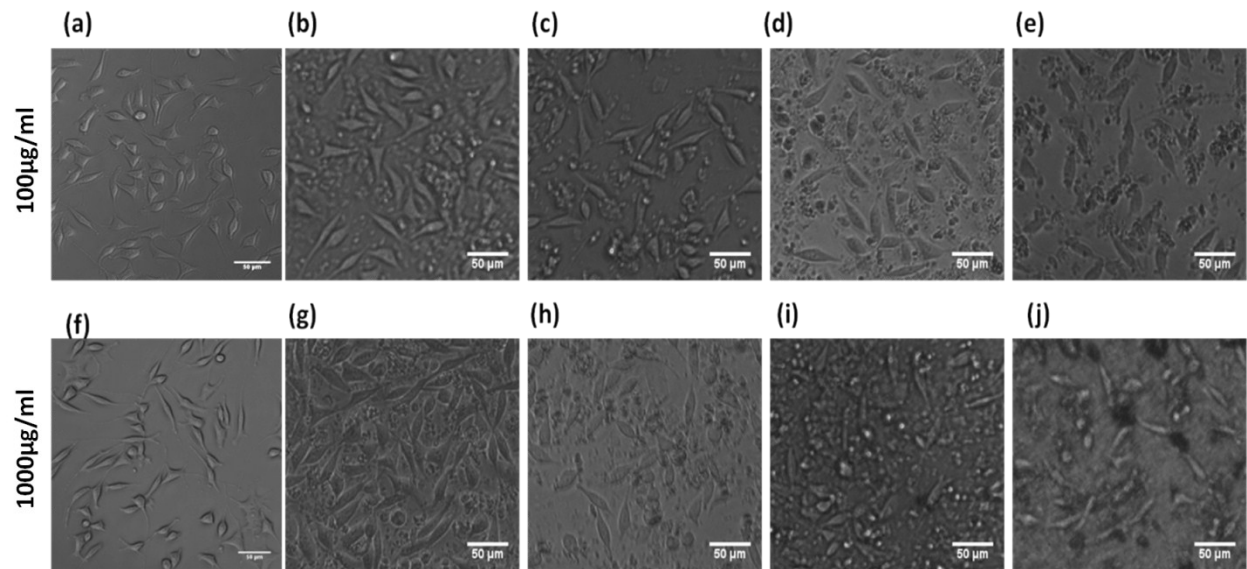

**Figure S12:** Biocompatibility studies: microscopic images of L929 cells after treatment with (a and f) control (TCP), (b and g) Nap-FFGSO, (c and h) Nap-FFGSO+A, (d and i) Nap-FFGSO+B and (e and j) Nap-FFGSO+A+B at 100µg/ml (0.13mM) and 1000µg/ml (1.3mM) concentrations, after 4 hrs of treatment.

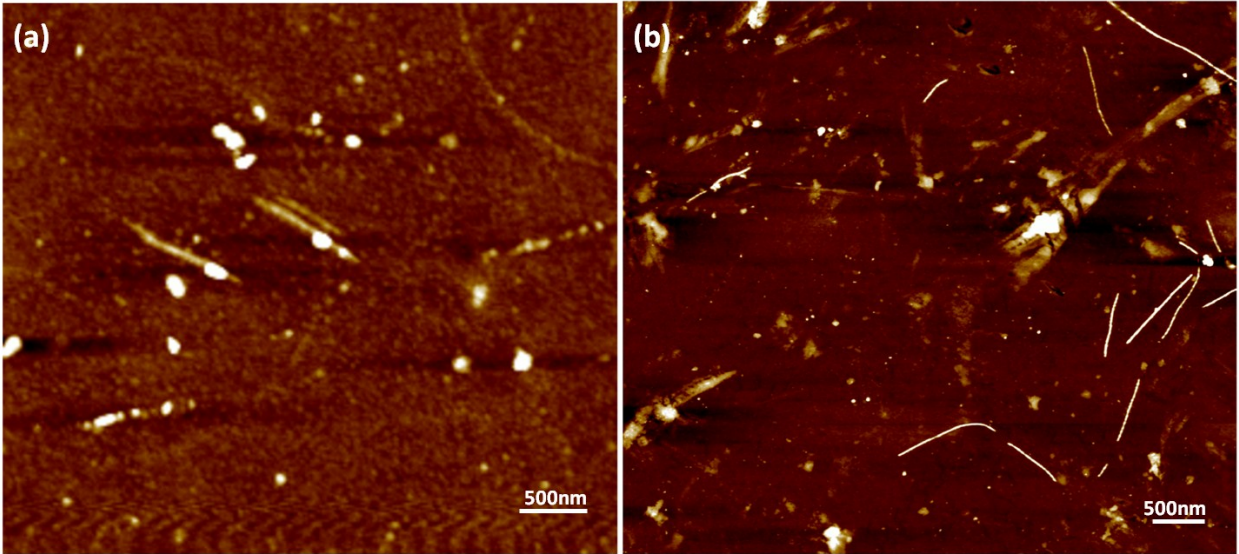

**Figure S13:** AFM images of 5mg/ml (6.5mM) stock diluted to (a) 100  $\mu\text{g/ml}$  (0.13mM) and (b) 1000 $\mu\text{g/ml}$  (1.3mM) peptide concentration.

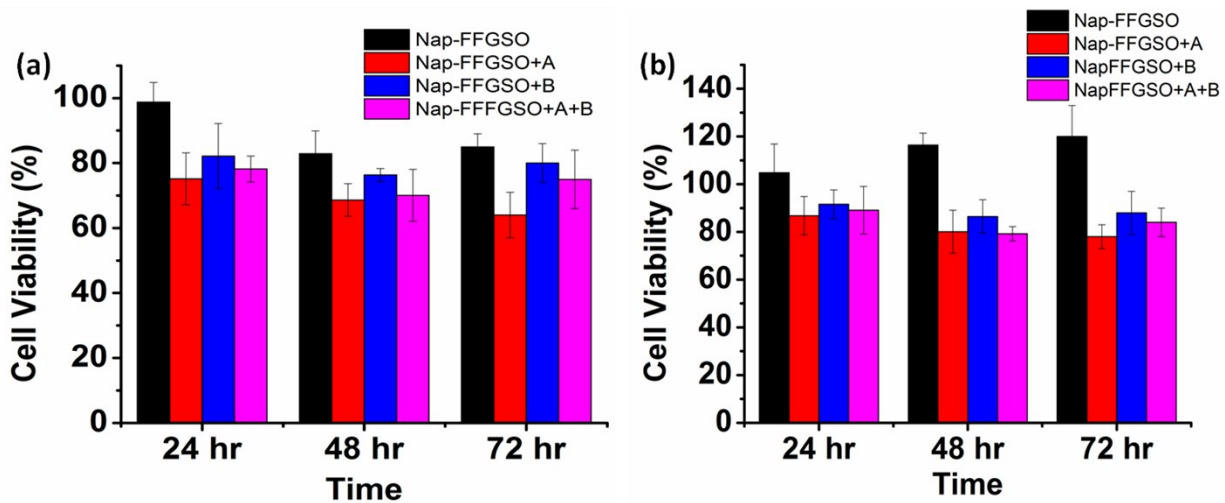

**Figure S14:** Biocompatibility studies of CIP-LMP peptide self-assembled structures with (a) C6 cells and (b) L929 cells when treated with peptide concentration of 1000 $\mu$ g/ml (1.3mM) for 24 hrs, 48 hrs and 72hrs.



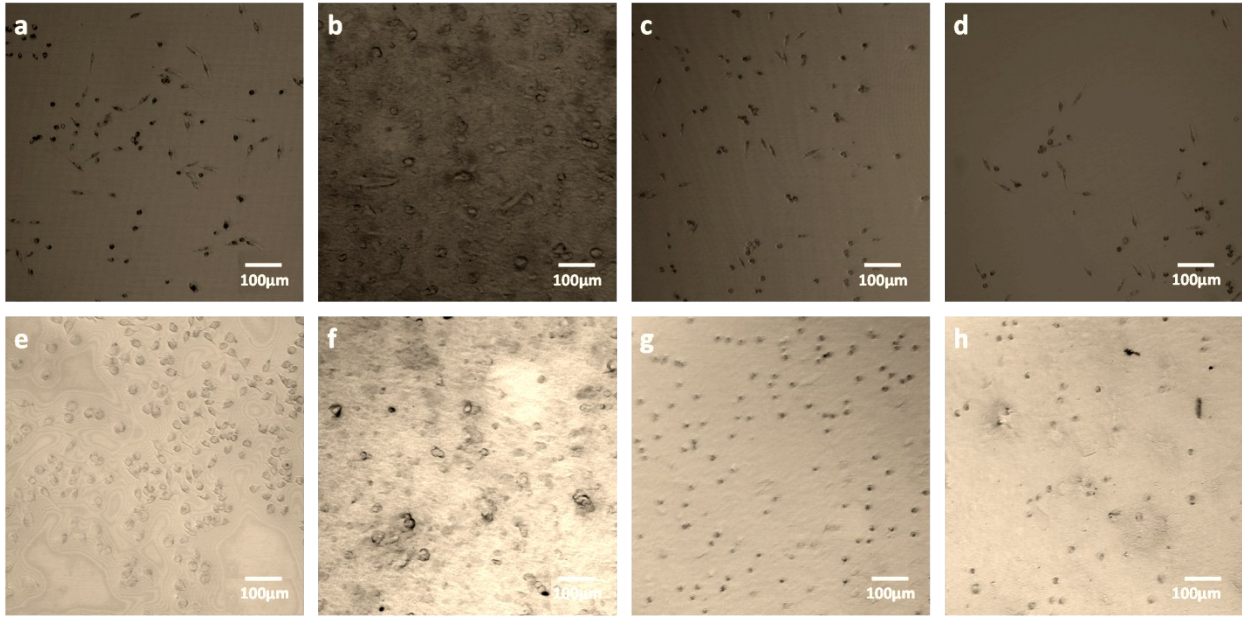

**Figure S15:** 2D culture phase contrast images of C6 and L929 cells with (a, e) control; (b, f) Nap-FFGSO+A; (c, g) Nap-FFGSO+B and (d, h) Nap-FFGSO+A+B co-assembled gels, respectively, after 24 hrs.

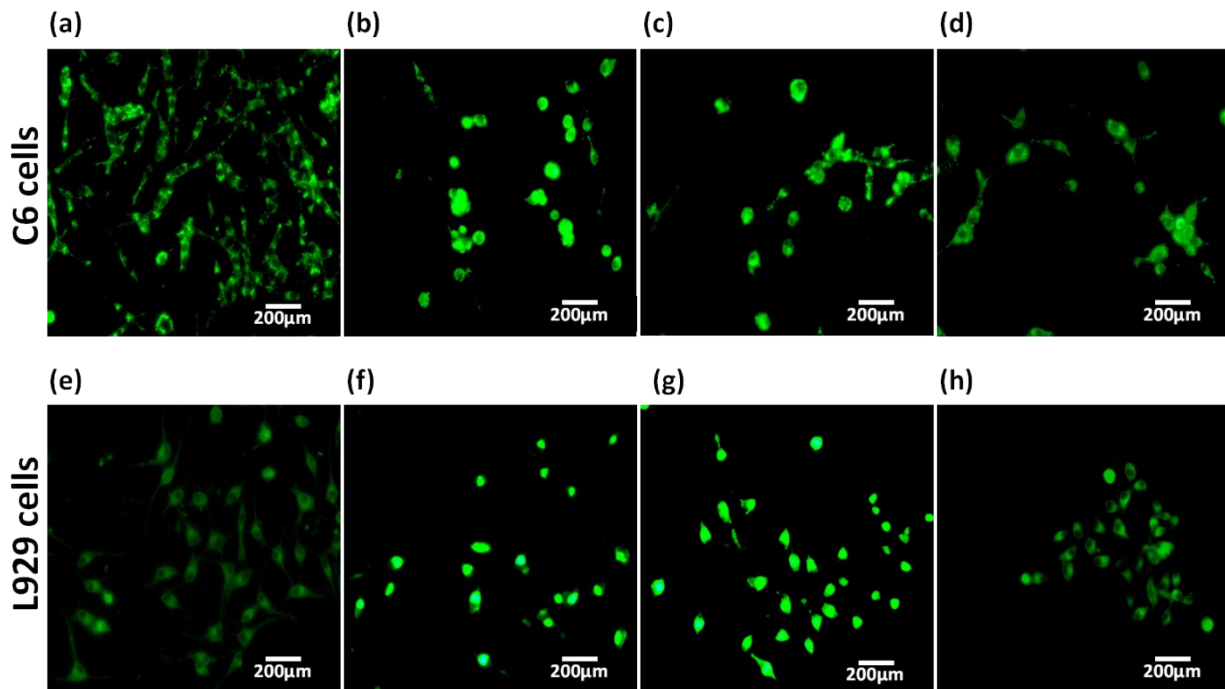

**Figure S16:** Live dead imaging using fluorescence microscope with C6 cells and L929 cells showing live cells (green) after 24 hrs cultured over (a and e) plastic (control), (b and f) Nap-FFGSO+A gels, (c and g) Nap-FFGSO+B gels and (d and h) Nap-FFGSO+A+B gels. No red signal observed indicating absence of dead cells after 24 hrs.

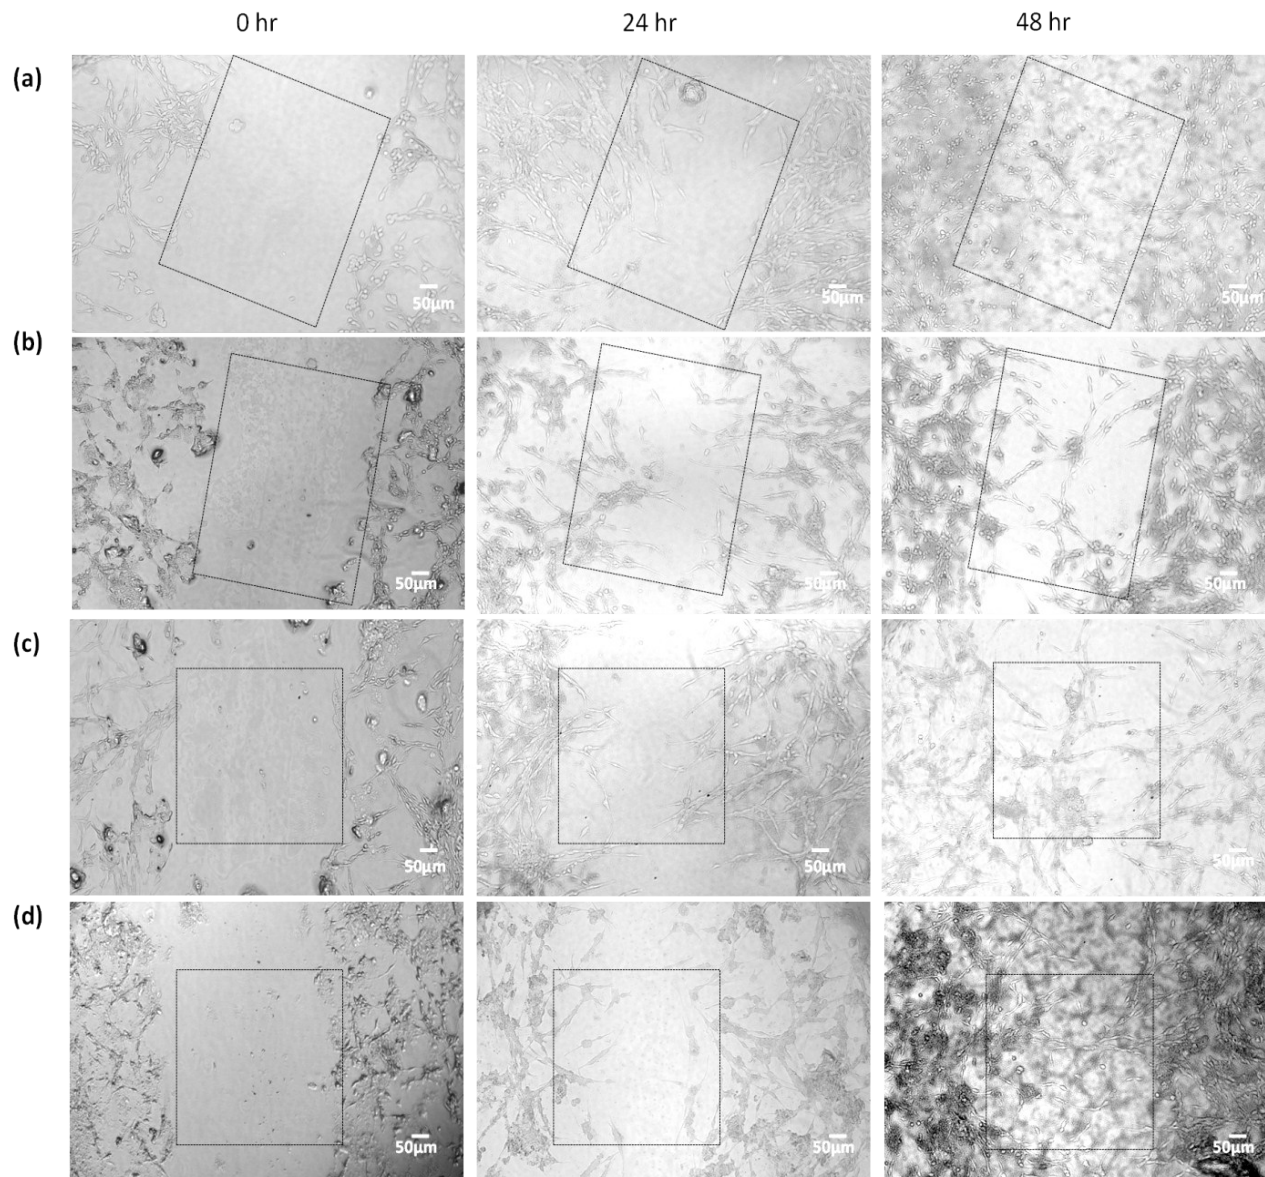

**Figure S17:** Proliferation and migration response of C6 cells in the presence of diluted peptide gels, assessed by microscopic images of scratched region after 0 hr, 24 hrs and 48 hrs time points after treatment with (a) control (2%DMSO/water, blank), (b) Nap-FFGSO+A, (c) Nap-FFGSO+B and (d) Nap-FFGSO+A+B at concentration of 1000µg/ml (1.3mM).

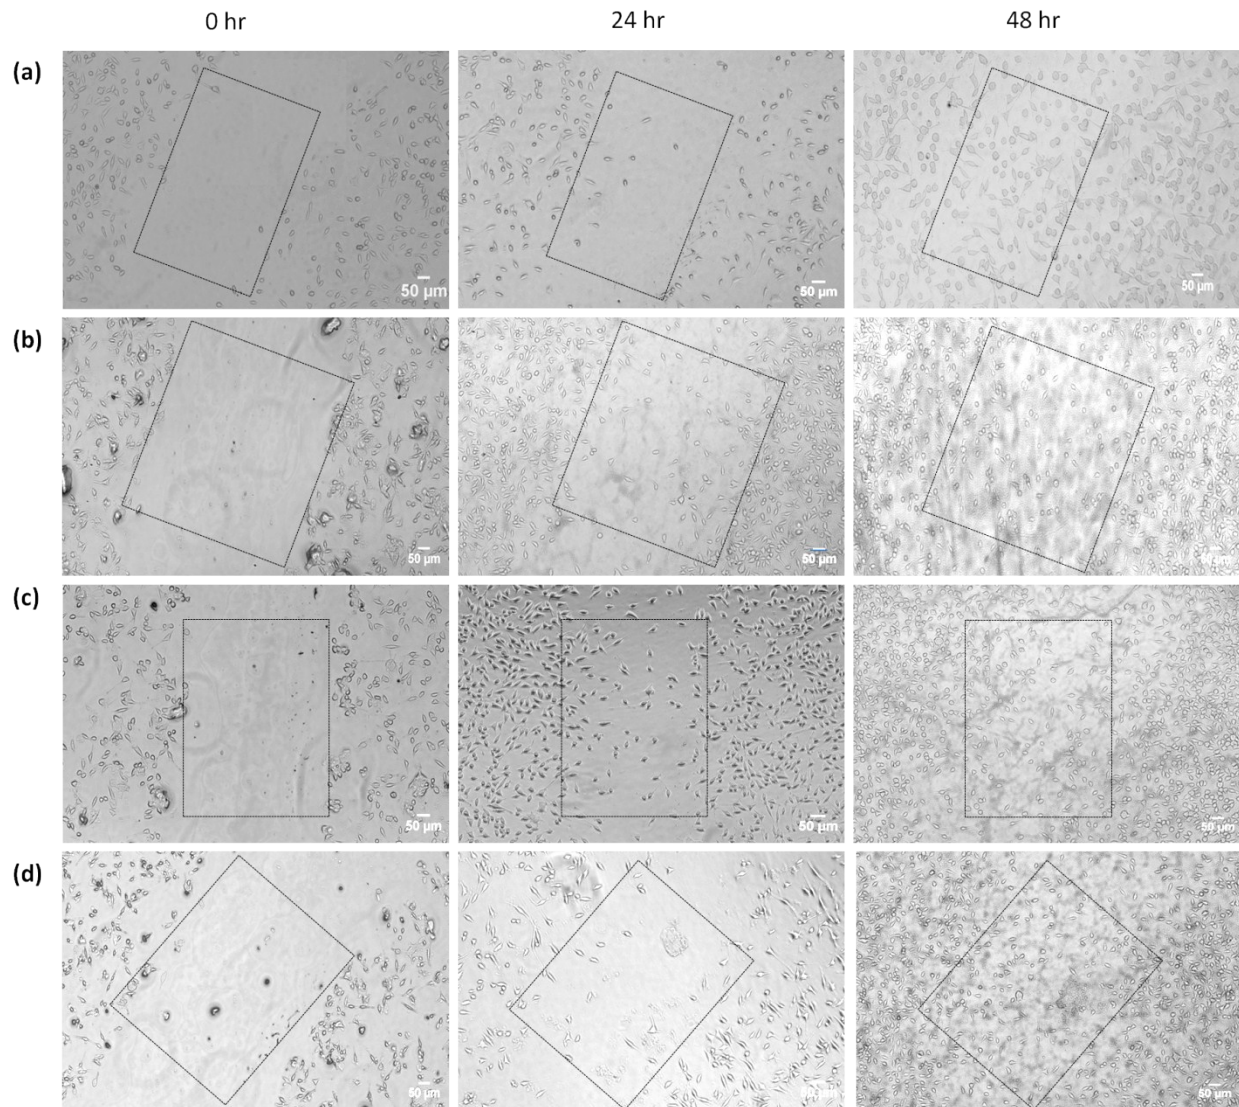

**Figure S18:** Proliferation and migration response of L929 cells in the presence of diluted peptide gels, assessed by microscopic images of scratched region after 0 hr, 24 hrs and 48 hrs time points after treatment with (a) control (40 2%DMSO/water, blank), (b) Nap-FFGSO+A, (c) Nap-FFGSO+B and (d) Nap-FFGSO+A+B at concentration of 1000µg/ml (1.3mM).
